# Supplementary material for: Energy and chemical conversion of five Australian lignocellulosic feedstocks into bio-crude through liquefaction
Source: Royal Society of Chemistry journal article supplement (doi:10.1039/c7ra02335a), 2017-01-01
Supplement: c7ra02335a1.pdf [file c7ra02335a1.pdf]

**Supplementary table:**

|                                                                                                           |
|-----------------------------------------------------------------------------------------------------------|
| Table S1 Product yields distribution from various recycled cycles at 300 ° for 30 min.                    |
| Table S2 Major compounds from recycled acetone                                                            |
| Table S3 Major compounds from oils produce under various temperatures.                                    |
| Fig. S1. FTIR spectra of SR liquefied in various temperatures 1- Raw AD, 2- 250 °C, 3- 300 °C, 4- 350 °C. |
| Fig. S2: FTIR spectra of raw feedstock and SR for various biomasses a) AD, b) Ba, c) BBS, d) FS, e) PT.   |

**Table S1**

Product yields distribution from various recycled cycles at 300 °, 1/15 B/S ratio for 30 min.

| acetone recycling runs | Bio-crude oil yield (wt.%)* | Solid residues yield (wt.%)* | Solvent + gas yield (wt.%)* |
|------------------------|-----------------------------|------------------------------|-----------------------------|
| zero                   | 44.5                        | 43                           | 12.5                        |
| first                  | 43                          | 39.7                         | 17.3                        |
| second                 | 41                          | 38.9                         | 20.1                        |
| third                  | 35                          | 35.8                         | 29.2                        |

\* wt% of dry basis

**Table S2**

Major compounds from recycled acetone

| No. | RT (min) | Chemical compound name                         | Area (%) |
|-----|----------|------------------------------------------------|----------|
| 1   | 2.15     | Ethane, 1,1-diethoxy-                          | 6.17     |
| 2   | 2.42     | Cyclobutene, 2-propenylidene                   | 1.27     |
| 3   | 2.76     | Propanoic acid, 2-hydroxy-, ethyl ester        | 3        |
| 4   | 2.86     | 2-Ethoxytetrahydrofuran                        | 2.73     |
| 5   | 2.91     | 1,3,5-Trioxane                                 | 1.12     |
| 6   | 3.02     | 2-Pentanone-4hydroxy-4methyl-                  | 1.78     |
| 7   | 4.17     | Phenol                                         | 1.57     |
| 8   | 4.61     | 3-Methylcyclopentane-1,2-dione                 | 2.22     |
| 9   | 5.03     | Propanoic acid, 2-methyl.                      | 4.83     |
| 10  | 5.17     | Cyclopropyl carbinol                           | 3.83     |
| 11  | 5.37     | 2-Cyclopenten-1-one,3-ethyl-2-hydroxy-         | 1.72     |
| 12  | 5.71     | Phenol, 4-ethyl                                | 24.36    |
| 13  | 5.8      | Butanoic acid, diethyl ester                   | 1.63     |
| 14  | 5.94     | 1,2-Benzenediol                                | 3.51     |
| 15  | 6.1      | Benzofuran, 2,3-dihydro-                       | 2.26     |
| 16  | 6.26     | Glutaric acid, 2-isopropylphenyl undecyl ester | 1.53     |
| 17  | 6.34     | 3-Octanol, 2,3-dimethyl                        | 1.7      |
| 18  | 6.45     | Butanoic acid, propyl ester                    | 2.11     |
| 19  | 6.48     | 1,2- Benzediol, 3-methyl-                      | 1.15     |
| 20  | 6.55     | Butanoic acid, 2-hydroxy-, ethyl ester         | 2.91     |
| 21  | 6.6      | Phenol, 4-ethyl-2-methoxy-                     | 3.01     |
| 22  | 7.04     | Ethyl pentofuranoside                          | 3.62     |
| 23  | 7.1      | Phenol, 2,6-dimethoxy-                         | 3.16     |
| 24  | 7.27     | Ethyl pentofuranoside                          | 2.27     |
| 25  | 7.78     | Phenol 2-methoxy-4-(1-propenyl)-               | 1.63     |

- Not detected or peak area less than 1% of total area.

**Table S3****Major compounds from A.donax oils produce under various temperatures.**

| No.   | RT (min) | Chemical compound name                                         | Area (%) |        |        |
|-------|----------|----------------------------------------------------------------|----------|--------|--------|
|       |          |                                                                | 250 °C   | 300 °C | 350 °C |
| 1     | 2.47     | 3-Penten-2-one                                                 | -        | -      | 3.6    |
| 2     | 2.58     | 4-Methyl-4-penten-2-one                                        | -        | 4.00   | 5.24   |
| 3     | 2.73     | Oxalic acid, allyl isobutyl ester                              | 1.89     | -      | -      |
| 4     | 3.01     | (Z)- 4-methyl-2-Pentene                                        | 3.77     | -      | 1.04   |
| 5     | 3.06     | 4-methyl-3-Penten-2-one                                        | -        | 7.97   | 35.72  |
| 6     | 3.4      | Methacrylic acid, ethyl ester                                  | 2.96     | -      | 0.59   |
| 7     | 3.5      | Furfural                                                       | 4.47     | -      | -      |
| 8     | 3.63     | 2-methyl-2-hexanol                                             | -        | 1.16   | -      |
| 9     | 3.77     | 2-Furanmethanol                                                | 8.98     | -      | -      |
| 10    | 3.96     | 2-Oxopropanoic acid, ethyl ester                               | 1.13     | -      | -      |
| 11    | 4.07     | 5-methyl-5-Hexen-2-one                                         | -        | 1.46   | -      |
| 12    | 4.41     | 3-methyl-3-Hexen-2-one                                         | -        | -      | 1.18   |
| 13    | 4.64     | 4-Hydroxybutanoic acid                                         | -        | 1.23   | -      |
| 14    | 4.87     | 2,5-Hexanedione                                                | 2.94     | 6.7    | 3.02   |
| 15    | 5.19     | 2-(1-hydroxy-1-methyl-2-oxopropyl)-2,5-dimethylfuran-3(2H)-one | 2.57     | 2.17   | -      |
| 16    | 5.53     | 1,2,5-trimethyl-Benzene                                        | -        | 1.95   | 6.69   |
| 17    | 5.66     | Phenol                                                         | -        | 1.5    | 1.1    |
| 18    | 6.12     | 2-Methylpropanoic acid anhydride                               | -        | 1.17   | -      |
| 19    | 6.4      | 3,6-Heptanedione                                               | 13.87    | 7.82   | 2.5    |
| 20    | 6.63     | 4-Hydroxy-2-methylbutanoic acid                                | 18.48    | 6.84   | 1.56   |
| 21    | 6.66     | 3-Methyl-2-cyclopenten-1-one                                   | -        | 2.95   | -      |
| 22    | 7.19     | (3Z,5E)-2,7-Dimethyl-3,5-octadiene                             | 4.75     | 3.93   |        |
| 23    | 7.48     | 2-Methoxyphenol                                                | 5.38     | 1.32   | 2.17   |
| 24    | 7.71     | 3,5-Dimethyl-2-cyclohexen-1-one                                | -        | -      | 3.47   |
| 25    | 7.81     | 2,6-Dimethyl-2,5-heptadien-4-one                               | -        | 2.17   | 2.54   |
| 26    | 8.01     | 3,5,5-Trimethyl-2-cyclohexen-1-ol                              | -        | -      | 3.18   |
| 27    | 8.65     | 4-Ethylphenol                                                  | 5.14     | 8.2    | 5.34   |
| 28    | 8.96     | 2-Acetyl-cyclopentanone                                        | -        | 2.73   | -      |
| 29    | 9.02     | 4-(2-Furyl)-3-buten-2-one                                      | 3.69     | 1.52   | -      |
| 30    | 9.13     | 3-Ethoxyphenol                                                 | -        | 3.3    | 1.57   |
| 31    | 9.45     | 2,3-Dihydrobenzofurane                                         | 3.8      | -      | -      |
| 32    | 10.44    | 4-Ethyl-2-methoxyphenol                                        | 9.19     | 8.07   | 3.04   |
| 33    | 10.98    | 2-Methoxy-4-vinylphenol                                        | 1.41     | -      | -      |
| 34    | 11.49    | 2,6-Dimethoxyphenol                                            | 5.61     | 1.54   | 1.65   |
| 35    | 12.07    | 4-Acetylphenol                                                 | -        | 1.48   | -      |
| 36    | 12.9     | 2-Methoxy-4-propenylphenol                                     | 1.18     | -      | -      |
| 37    | 13.9     | 5-tert-Butylpyrogallol                                         | -        | 1.1    | -      |
| Total |          |                                                                | 96.46    | 78.69  | 92.95  |

- Not detected or peak area less than 1% of total area.

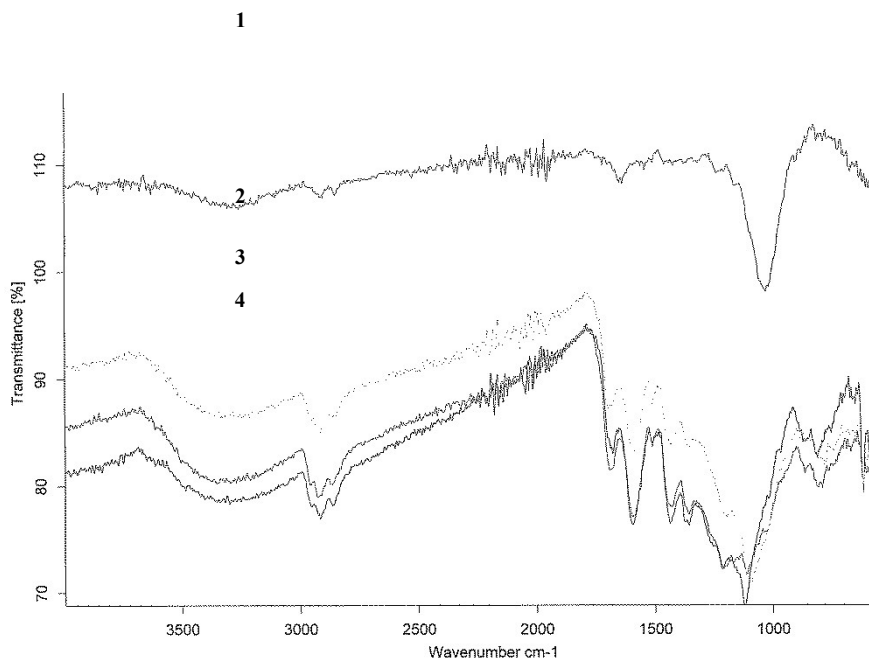

**Fig. S1. FTIR spectra of SR liquefied in various temperatures 1- Raw AD, 2- 250 °C, 3- 300 °C, 4- 350 °C.**

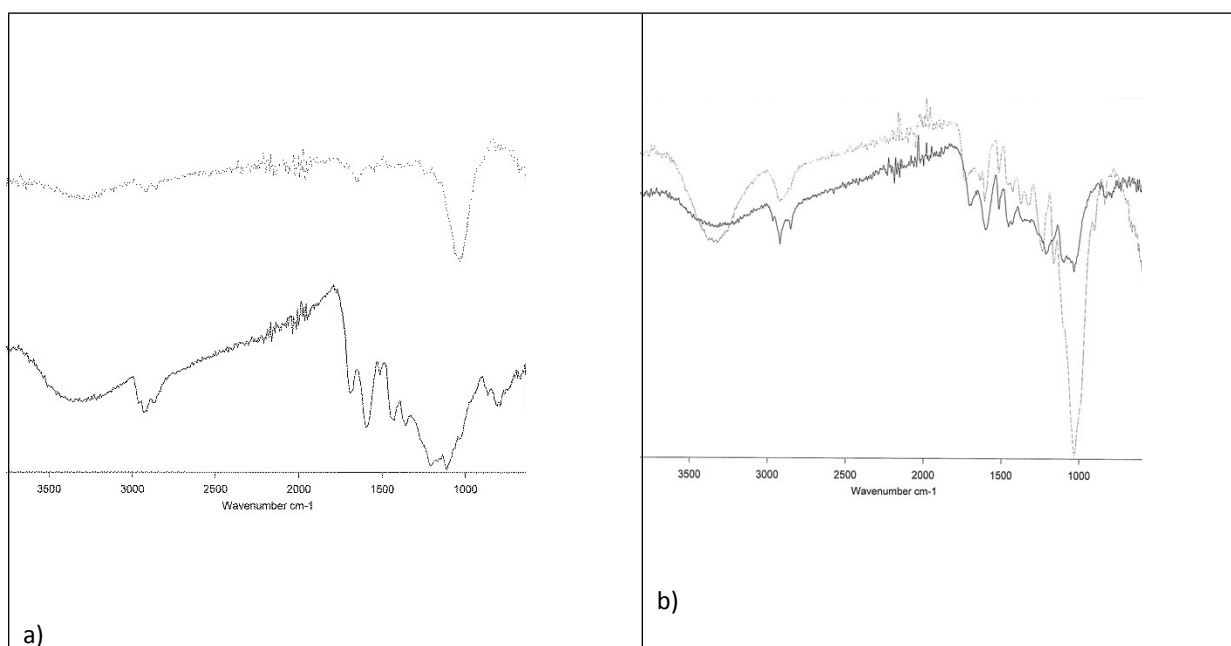

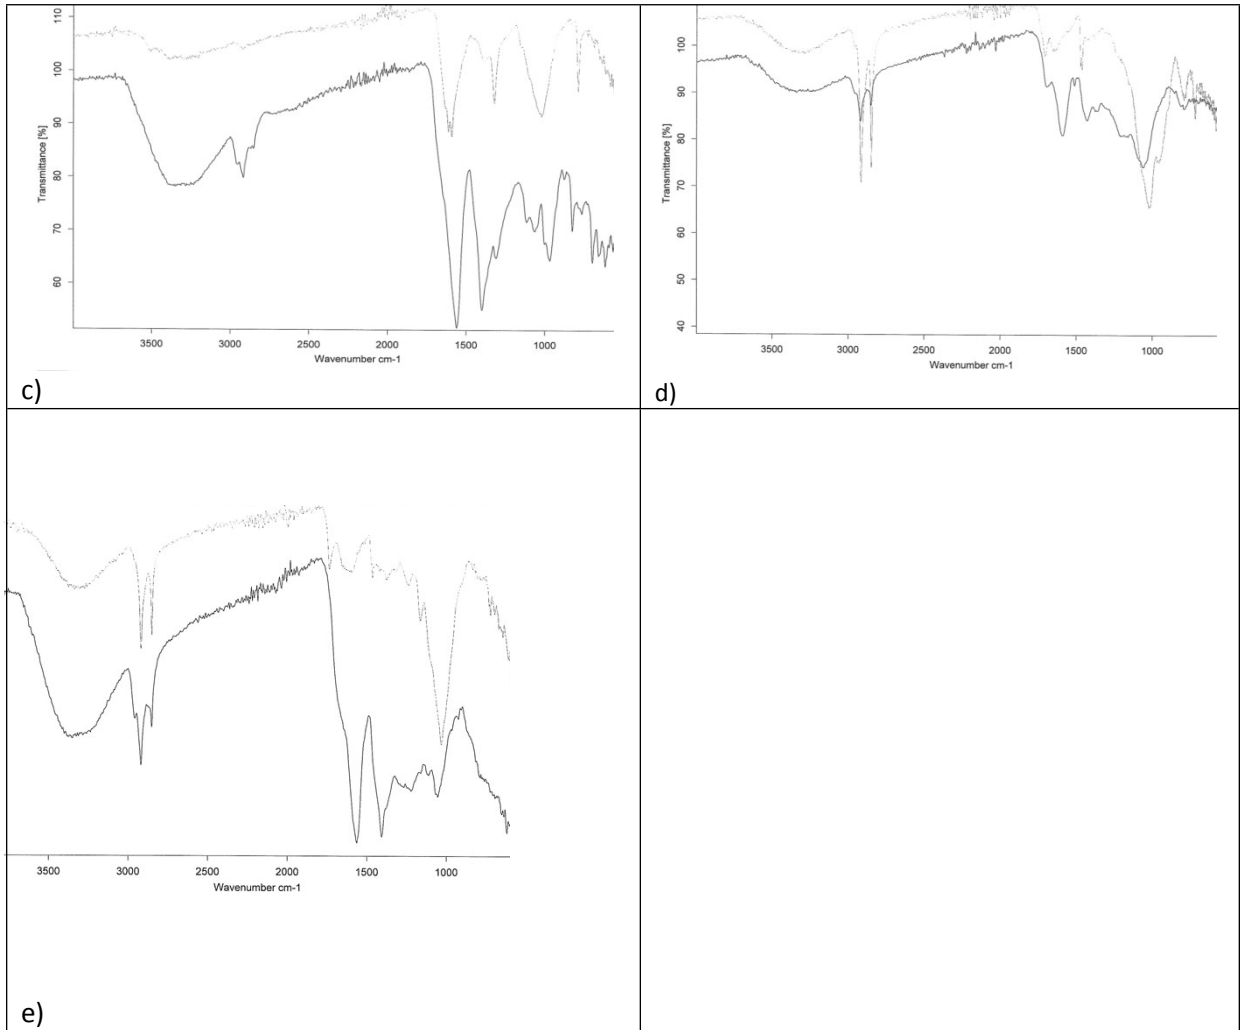

**Fig. S2: FTIR spectra of raw feedstock and SR for various biomasses a) AD, b) Ba, c) BBS, d) FS, e) PT.**
